# Supplementary material for: Pan-cancer analysis of the interplay between mutational signatures and cellular signaling
Source: PubMed Central journal article supplement — iScience. 2024 May 2;27(6):109873. doi: 10.1016/j.isci.2024.109873 (PMC11112613; doi:10.1016/j.isci.2024.109873), 2024-05-02
Supplement: mmc1.pdf [file mmc1.pdf]

**iScience, Volume 27**

**Supplemental information**

**Pan-cancer analysis of the interplay between  
mutational signatures and cellular signaling**

**Anna Hakobyan, Mathilde Meyenberg, Nelli Vardazaryan, Joel Hancock, Loan Vulliard, Joanna I. Loizou, and Jörg Menche**

# Supplementary Figure 1

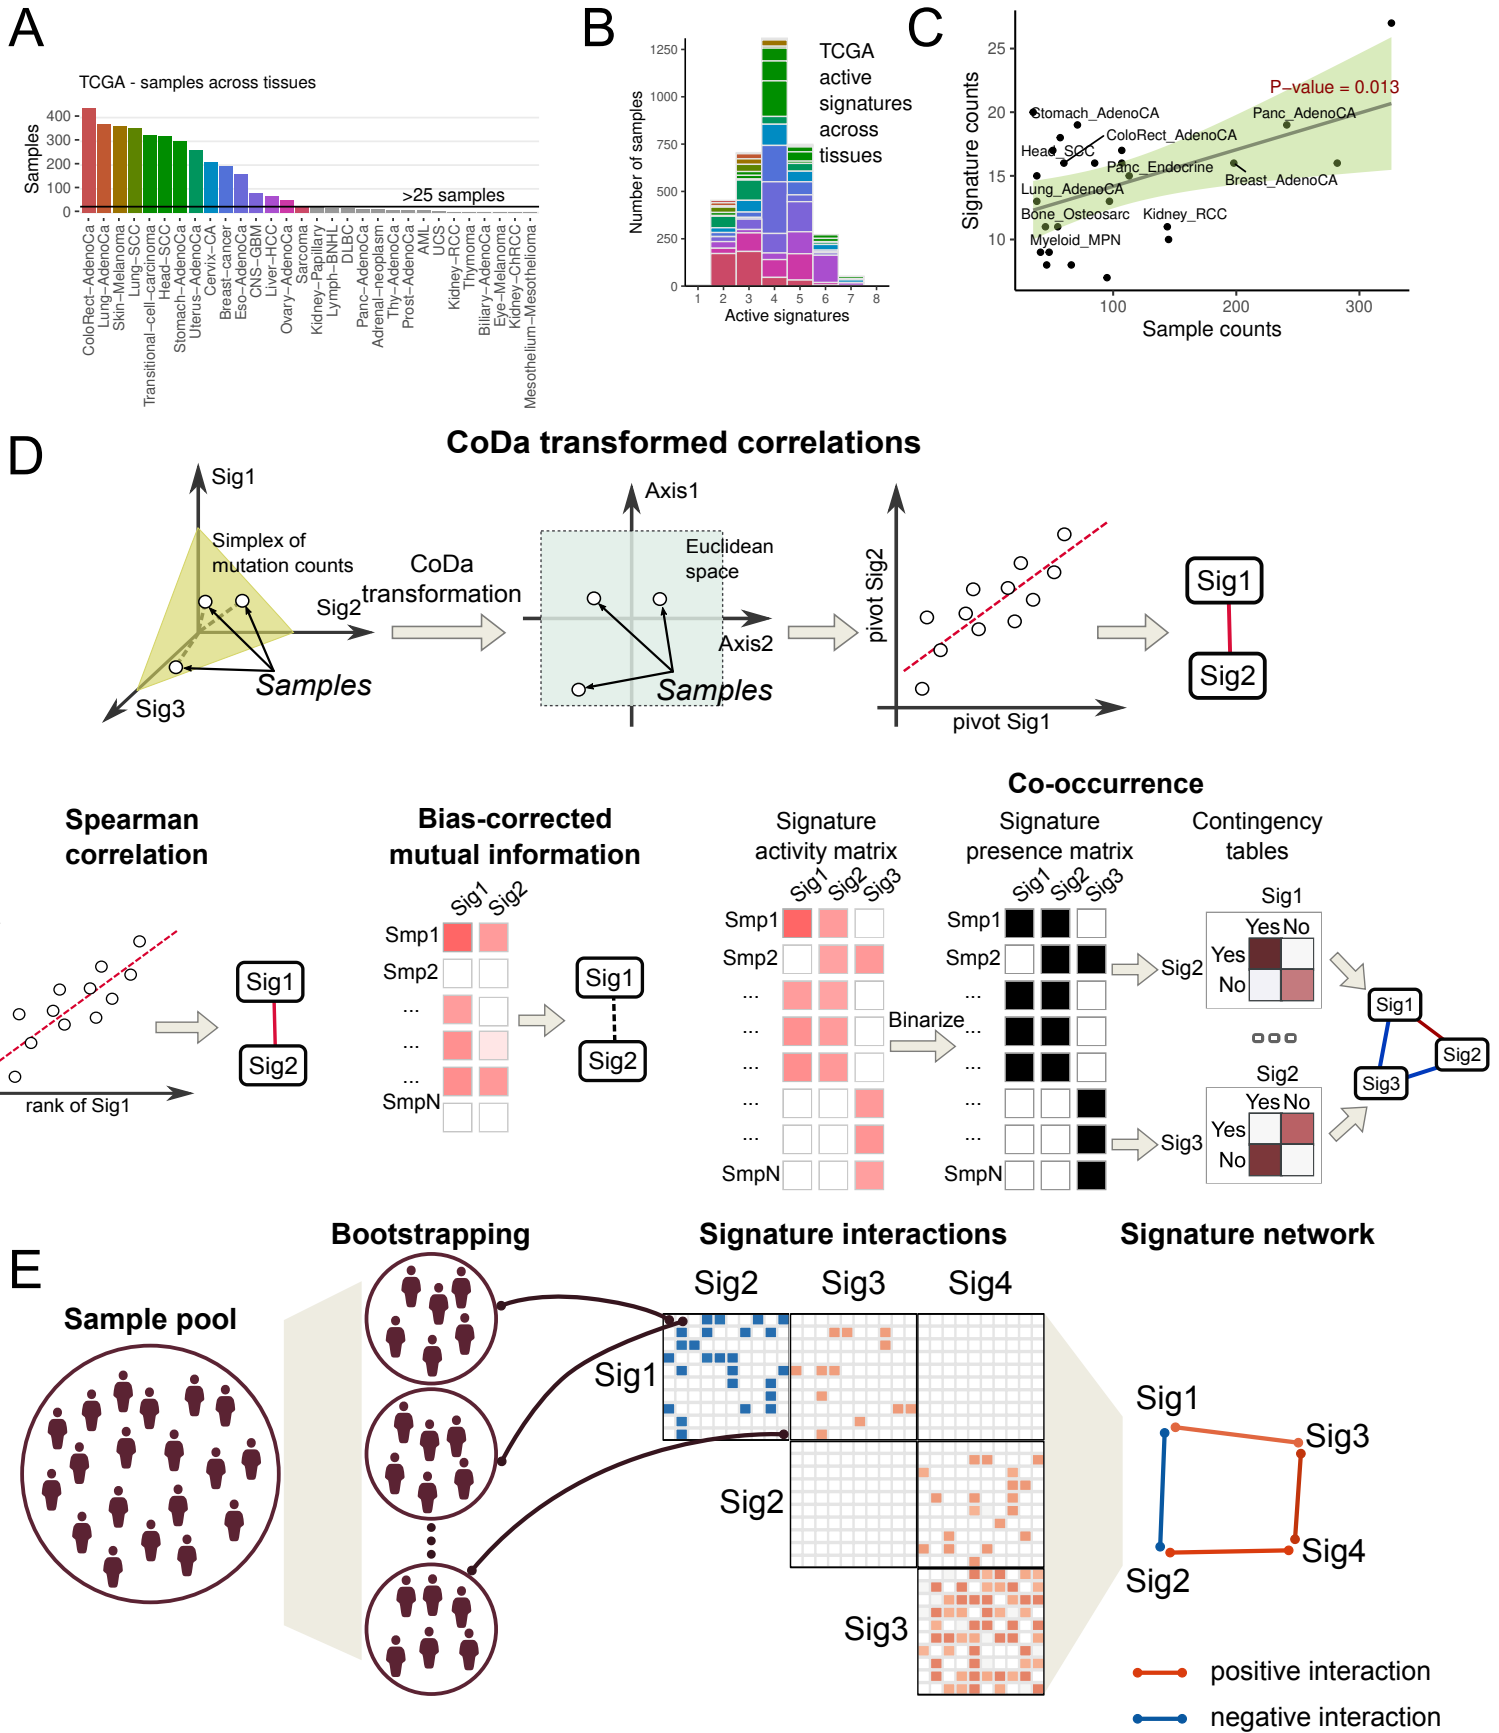

**Supp. Fig. 1 Overview of the TCGA data and procedures for signature-signature metric calculation, related to Figure 1. A.** The number of samples in TCGA across cancer types. **B.** Number of active mutational signatures in TCGA across cancer types. **C.** The relationship between the number of identified signatures and samples across tissues. **D.** Schematic diagram of used metrics. **E.** Bootstrapping procedure used for signature-signature interactions.

# Supplementary Figure 2

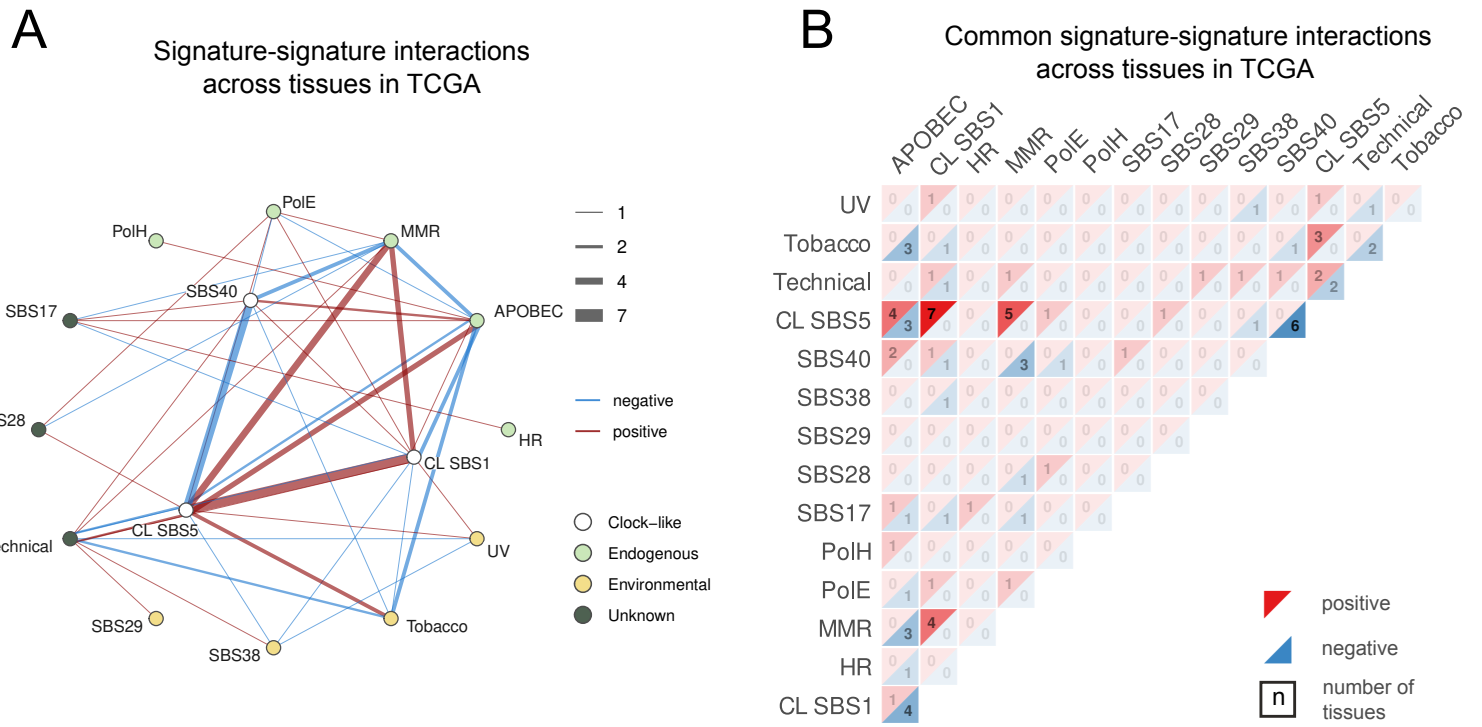

**Supp. Fig. 2. Signature-signature interactions in TCGA, related to Figure 2. A.** Network summary of all detected signature-signature interactions in TCGA. **B.** Summary of common interactions in TCGA across tissues. Positive (red) and negative (blue) interactions are summarized separately and the numbers indicate the number of tissues in which this interaction was detected.

# Supplementary Figure 3

## A Pathway alterations across cancer types in TCGA

|                             |     |     |     |     |     |     |     |    |     |    |
|-----------------------------|-----|-----|-----|-----|-----|-----|-----|----|-----|----|
| Uterus_AdenoCa              | 77  | 177 | 114 | 255 | 142 | 156 | 121 | 73 | 63  | 42 |
| Transitional_cell_carcinoma | 267 | 200 | 211 | 153 | 139 | 70  | 90  | 66 | 27  | 28 |
| Stomach_AdenoCa             | 186 | 179 | 171 | 123 | 126 | 110 | 78  | 55 | 81  | 5  |
| Skin_Melanoma               | 216 | 273 | 78  | 95  | 80  | 69  | 69  | 23 | 21  | 3  |
| Sarcoma                     | 18  | 13  | 22  | 9   | 6   | 6   | 10  | 4  | 2   | 1  |
| Ovary_AdenoCa               | 12  | 12  | 22  | 14  | 6   | 4   | 6   | 7  | 3   | 2  |
| Lung_SCC                    | 287 | 193 | 307 | 244 | 116 | 60  | 106 | 43 | 38  | 80 |
| Lung_AdenoCa                | 196 | 247 | 227 | 145 | 84  | 70  | 95  | 84 | 37  | 57 |
| Liver_HCC                   | 54  | 12  | 36  | 21  | 22  | 36  | 12  | 17 | 8   | 5  |
| Head_SCC                    | 260 | 141 | 243 | 136 | 125 | 53  | 130 | 67 | 42  | 43 |
| Eso_AdenoCa                 | 135 | 87  | 133 | 65  | 45  | 31  | 29  | 32 | 30  | 18 |
| ColoRect_AdenoCa            | 179 | 300 | 282 | 165 | 133 | 370 | 71  | 99 | 114 | 6  |
| CNS_GBM                     | 18  | 15  | 10  | 16  | 5   | 4   | 4   | 0  | 1   | 0  |
| Cervix_CA                   | 44  | 68  | 26  | 126 | 71  | 29  | 53  | 12 | 26  | 20 |
| Breast_cancer               | 93  | 95  | 118 | 126 | 52  | 41  | 35  | 53 | 20  | 2  |

Cell Cycle  
 RTK RAS  
 TP53  
 PI3K  
 NOTCH  
 WNT  
 HIPPO  
 MYC  
 TGF-Beta  
 NRF2

## B

RTK-RAS and UV mutations in melanoma

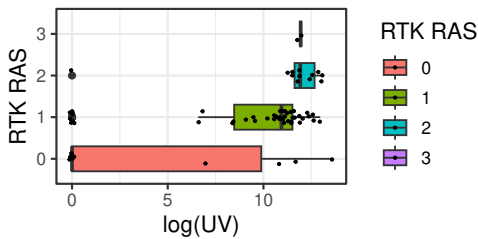

## E

Breast\_AdenoCA - PCAWG

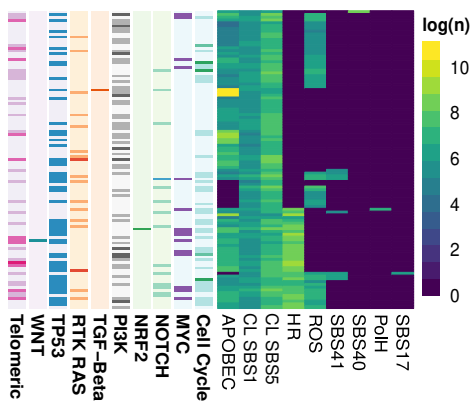

## G

PCAWG - Skin\_Melanoma

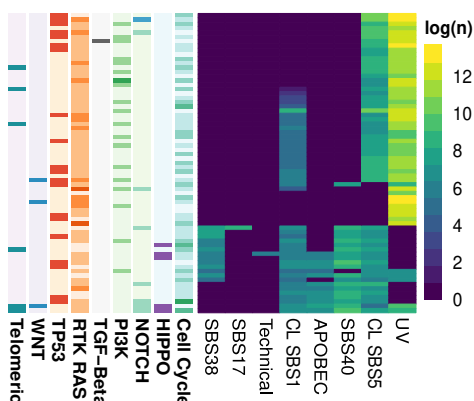

## C

Signature-pathway co-occurrence in TCGA

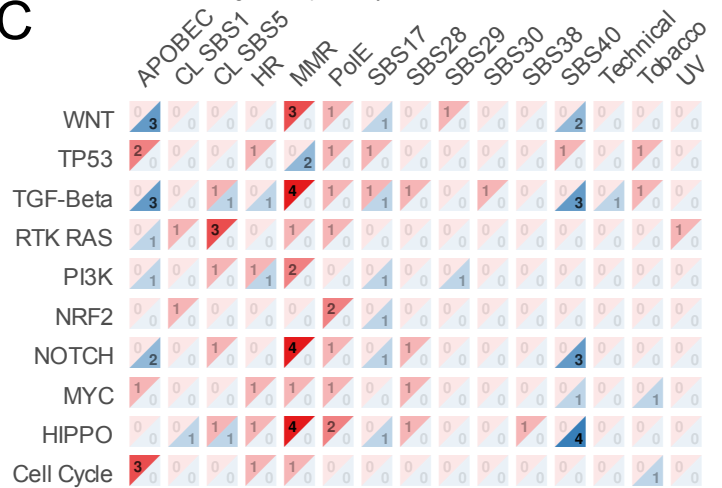

## D

Bipartite network of all signature-pathway interactions in TCGA

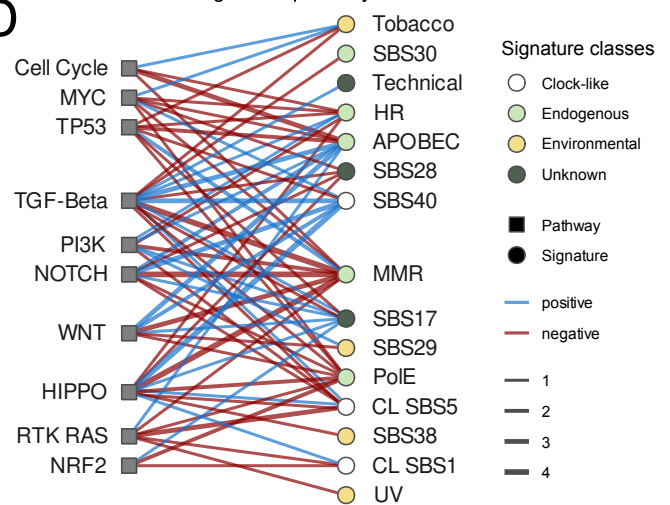

## F

Breast\_cancer - TCGA

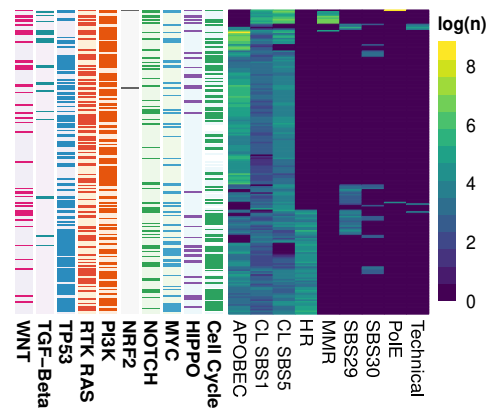

## H

PCAWG - Skin\_Melanoma Signature-pathway interactions

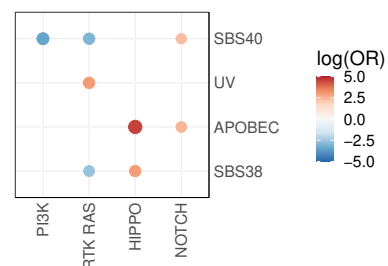

**Supp. Fig. 3. Signature-pathway interactions in TCGA and case-inspections for selected tissues, related to Figure 3.** **A.** Numeric summary of pathway alterations in TCGA. **B.** Boxplot demonstrating the interaction between UV signature and resulting RTK-RAS mutation counts in melanoma. The boxes indicate 25th and 75th percentile, whiskers extend no longer than  $1.5 * IQR$  (inter-quartile range). **C.** Summary of signature-pathway co-occurrence across tissues in TCGA. Positive (red) and negative (blue) interactions are summarized separately and the numbers indicate the number of tissues in which this interaction has been detected. **D.** Bipartite graph of signature-pathway co-occurrence in TCGA. **E-G.** Signature activities along with annotations of pathway alterations in selected tissues. **H.** Significant signature-pathway interactions in melanoma in PCAWG dataset.

# Supplementary Figure 4

## A TCGA signature-pathway analysis summaries

### Co-occurrence

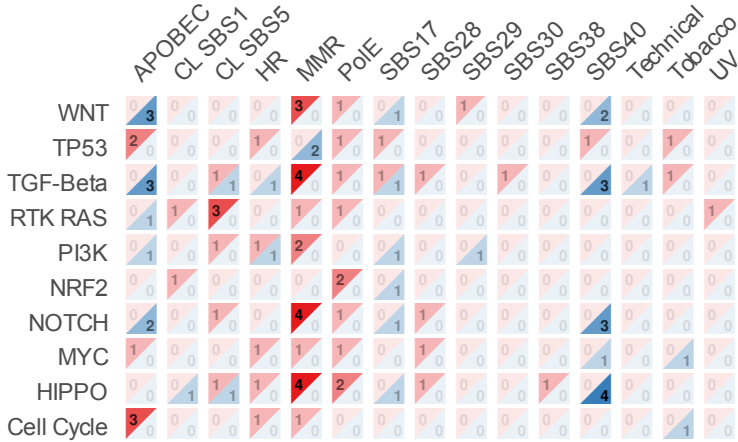

### lm(signature ~ pathway)

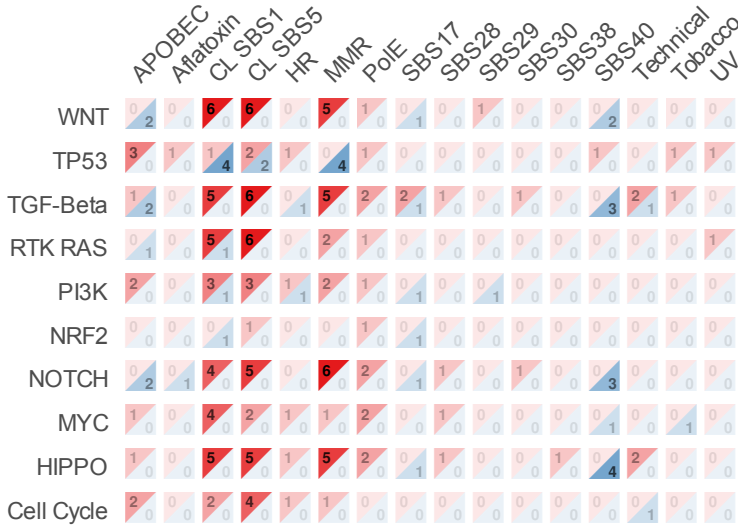

### glm(pathway ~ signature)

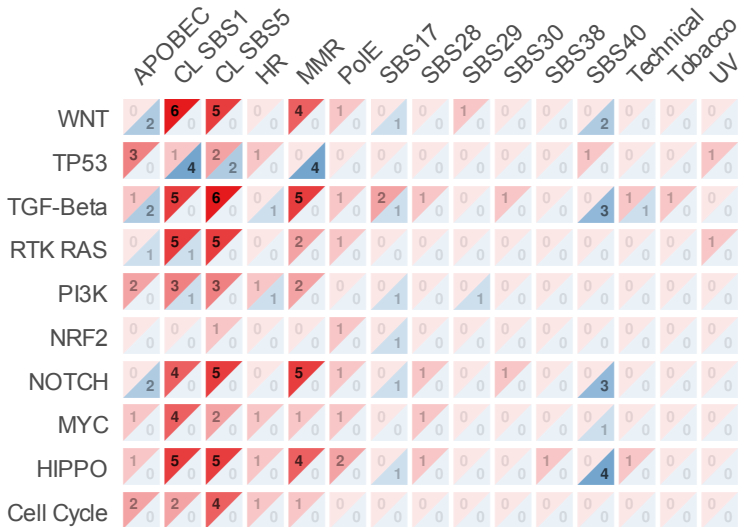

## B PCAWG signature-pathway analysis summaries

### Co-occurrence

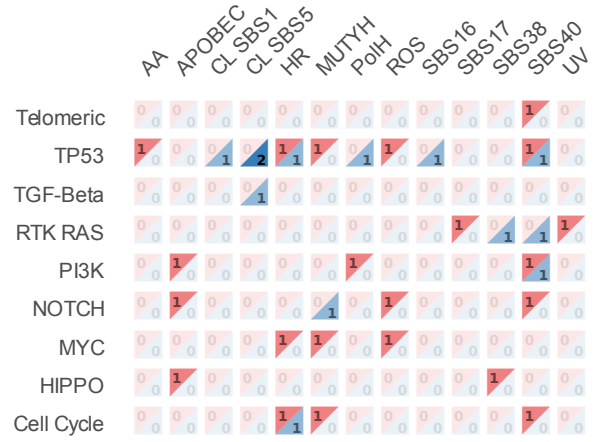

### lm(signature ~ pathway)

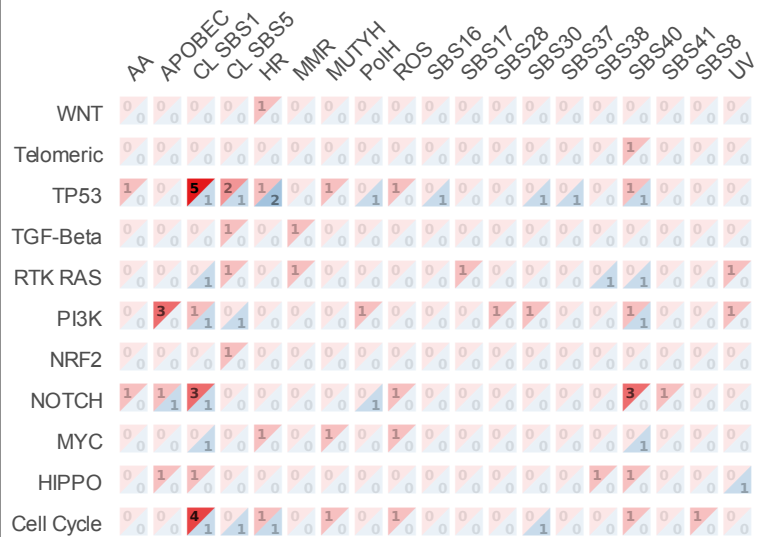

### glm(pathway ~ signature)

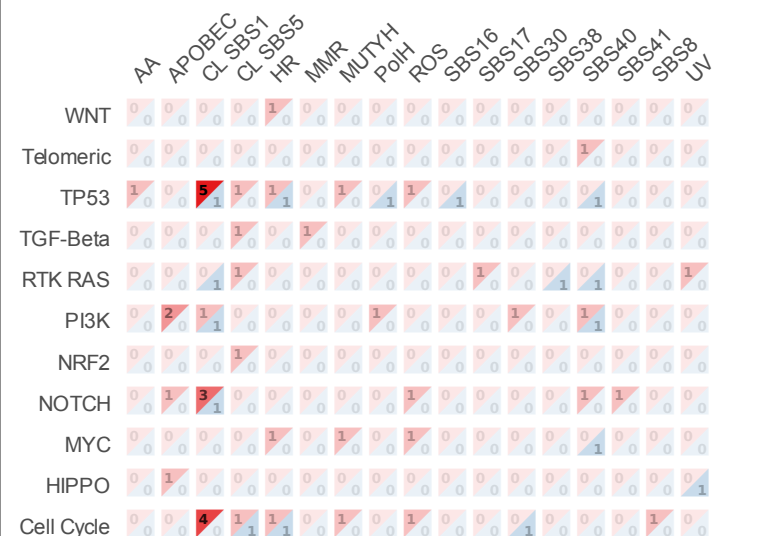

**Supp. Fig. 4. Summary of signature-pathway interactions across tissues in TCGA and PCAWG, related to Figure 4. Summaries of interaction metrics across PCAWG and TCGA.**

# Supplementary Figure 5

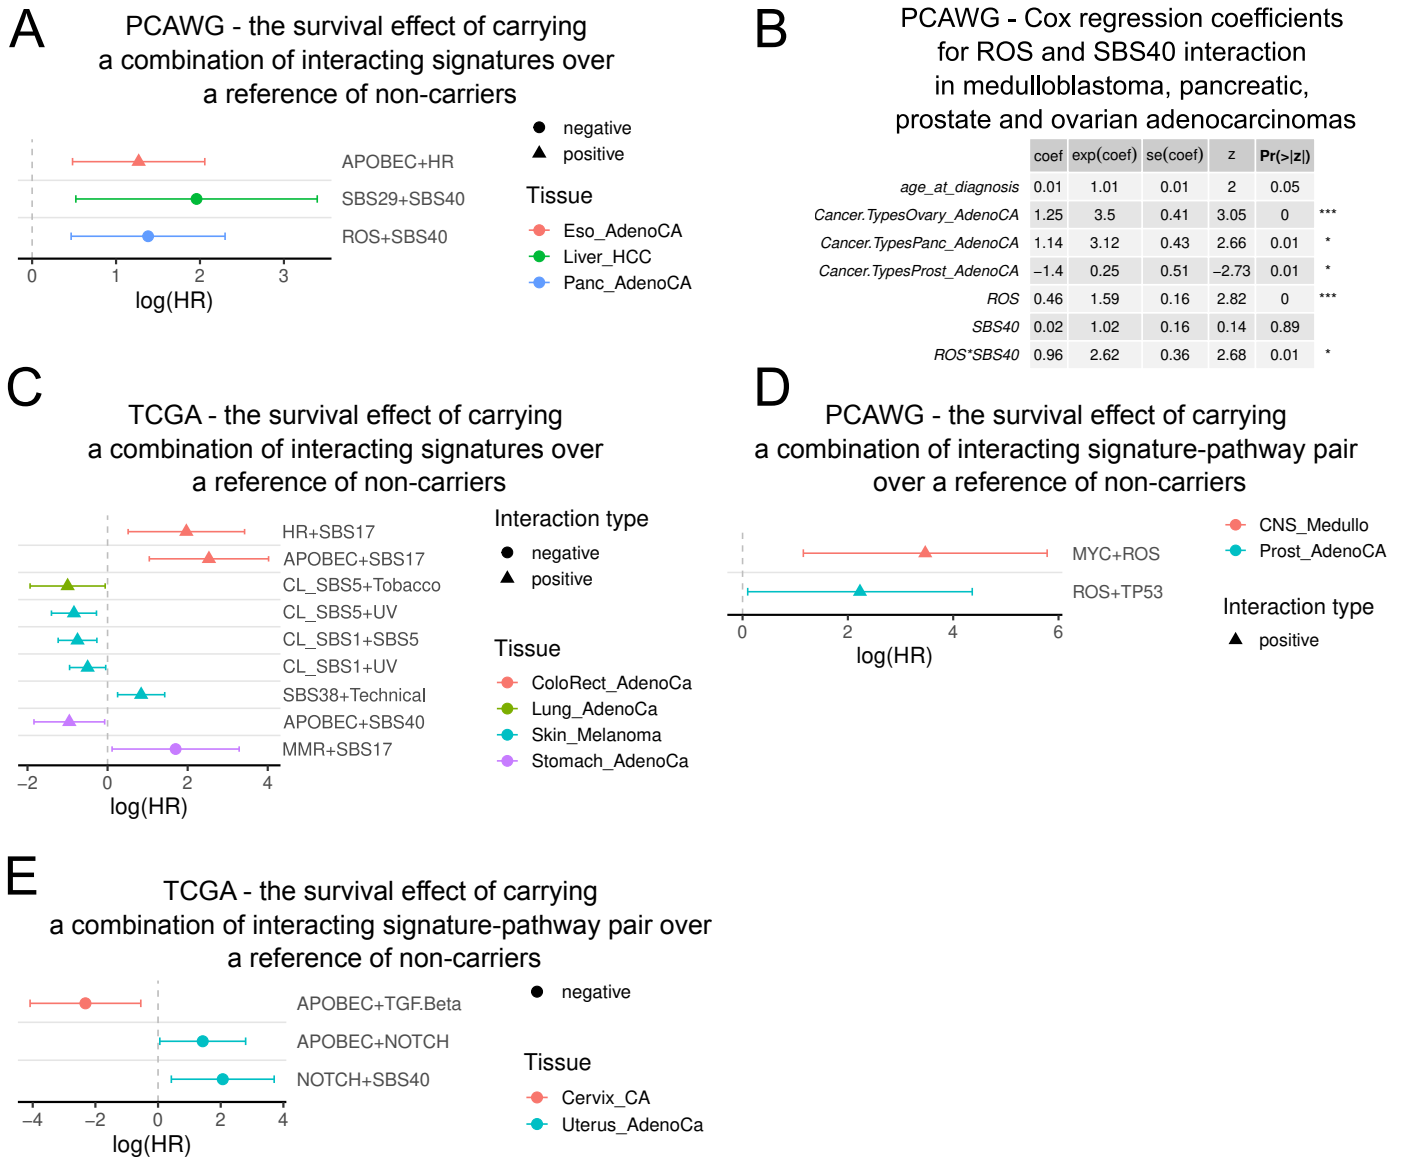

**Supp. Fig. 5. Survival analysis results for survival models with non-epistatic interaction models, related to Figure 5.** **A.** Survival effect of signature-signature interactions obtained from survival models that compare samples of carriers of both interactors to non-carriers. The error bars in A, C, D, E correspond to the 95% confidence interval of the HR estimate. **B.** Regression coefficients of SBS40 and ROS interactions in specified tissues. The asterisk flags following p-value thresholds -  $P < 0.05$  (\*),  $P < 0.01$  (\*\*),  $P < 0.001$  (\*\*\*). **C-E.** Similar to panel **A**, interactions in TCGA for signature-signature interactions and signature-pathway interactions in PCAWG and TCGA.

# Supplementary Figure 6

## A

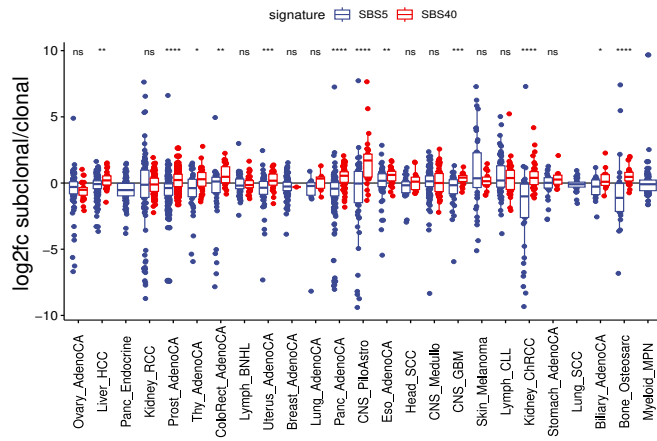

**Supp. Fig. 6. The log<sub>2</sub>FC fraction of subclonal vs clonal mutations attributed to SBS5 and SBS40 signatures across cancer types in PCAWG dataset based on data analyzed by Gerstung et al.<sup>[s1]</sup>. Related to Figure 5.**



**Supplementary Table 1 related to Figures 2-5: Signature annotations**

| Signature | Class      | Description            | Annotation | Origin        |
|-----------|------------|------------------------|------------|---------------|
| SBS1      | Ageing     | Ageing                 | CL SBS1    | Clock-like    |
| SBS2      | APOBEC/AID | APOBEC                 | APOBEC     | Endogenous    |
| SBS3      | BER/HR     | HR                     | HR         | Endogenous    |
| SBS4      | Environ    | Tobacco-smoking        | Tobacco    | Environmental |
| SBS5      | Unknown    | Unknown                | CL SBS5    | Clock-like    |
| SBS6      | MMR        | MMR                    | MMR        | Endogenous    |
| SBS7a     | UV         | UV                     | UV         | Environmental |
| SBS7b     | UV         | UV                     | UV         | Environmental |
| SBS7c     | UV         | UV                     | UV         | Environmental |
| SBS7d     | UV         | UV                     | UV         | Environmental |
| SBS8      | Unknown    | Unknown                | SBS8       | Unknown       |
| SBS9      | Polymerase | PoIH                   | PoIH       | Endogenous    |
| SBS10a    | Polymerase | PoIE                   | PoIE       | Endogenous    |
| SBS10b    | Polymerase | PoIE                   | PoIE       | Endogenous    |
| SBS11     | Chemo      | Temozolomide treatment | Chemo      | Environmental |
| SBS12     | Unknown    | Unknown                | SBS12      | Unknown       |
| SBS13     | APOBEC/AID | APOBEC                 | APOBEC     | Endogenous    |
| SBS14     | MMR        | PoIE + MMR             | MMR        | Endogenous    |
| SBS15     | MMR        | MMR                    | MMR        | Endogenous    |
| SBS16     | Unknown    | Unknown                | SBS16      | Unknown       |
| SBS17a    | Unknown    | Unknown                | SBS17      | Unknown       |
| SBS17b    | Unknown    | Unknown                | SBS17      | Unknown       |
| SBS18     | Environ    | ROS                    | ROS        | Endogenous    |
| SBS19     | Unknown    | Unknown                | SBS19      | Unknown       |
| SBS20     | MMR        | POLD1 + MMR            | MMR        | Endogenous    |
| SBS21     | MMR        | MMR                    | MMR        | Endogenous    |
| SBS22     | Environ    | Aristolochic acid      | AA         | Environmental |
| SBS23     | Unknown    | Unknown                | SBS23      | Unknown       |
| SBS24     | Environ    | Aflatoxin              | Aflatoxin  | Environmental |
| SBS25     | Chemo      | Chemotherapy           | Chemo      | Environmental |
| SBS26     | MMR        | MMR                    | MMR        | Endogenous    |
| SBS27     | Technical  | Technical              | Technical  | Unknown       |
| SBS28     | Unknown    | Unknown                | SBS28      | Unknown       |
| SBS29     | Environ    | Tobacco chewing        | SBS29      | Environmental |
| SBS30     | BER/HR     | NTHL1                  | SBS30      | Endogenous    |
| SBS31     | Chemo      | Platinum chemotherapy  | Chemo      | Environmental |
| SBS32     | Chemo      | Azathioprine           | Chemo      | Environmental |
| SBS33     | Unknown    | Unknown                | SBS33      | Unknown       |
| SBS34     | Unknown    | Unknown                | SBS34      | Unknown       |
| SBS35     | Chemo      | Platinum chemotherapy  | Chemo      | Environmental |

|       |            |                         |            |               |
|-------|------------|-------------------------|------------|---------------|
| SBS36 | BER/HR     | MUTYH                   | MUTYH      | Endogenous    |
| SBS37 | Unknown    | Unknown                 | SBS37      | Unknown       |
| SBS38 | UV         | Indirect effect of UV   | SBS38      | Environmental |
| SBS39 | Unknown    | Unknown                 | SBS39      | Unknown       |
| SBS40 | Unknown    | Unknown                 | SBS40      | Clock-like    |
| SBS41 | Unknown    | Unknown                 | SBS41      | Unknown       |
| SBS42 | Environ    | Haloalkane exposure     | Haloalkane | Environmental |
| SBS43 | Technical  | Technical               | Technical  | Unknown       |
| SBS44 | MMR        | MMR                     | MMR        | Endogenous    |
| SBS45 | Technical  | Technical               | Technical  | Unknown       |
| SBS46 | Technical  | Technical               | Technical  | Unknown       |
| SBS47 | Technical  | Technical               | Technical  | Unknown       |
| SBS48 | Technical  | Technical               | Technical  | Unknown       |
| SBS49 | Technical  | Technical               | Technical  | Unknown       |
| SBS50 | Technical  | Technical               | Technical  | Unknown       |
| SBS51 | Technical  | Technical               | Technical  | Unknown       |
| SBS52 | Technical  | Technical               | Technical  | Unknown       |
| SBS53 | Technical  | Technical               | Technical  | Unknown       |
| SBS54 | Technical  | Technical               | Technical  | Unknown       |
| SBS55 | Technical  | Technical               | Technical  | Unknown       |
| SBS56 | Technical  | Technical               | Technical  | Unknown       |
| SBS57 | Technical  | Technical               | Technical  | Unknown       |
| SBS58 | Technical  | Technical               | Technical  | Unknown       |
| SBS59 | Technical  | Technical               | Technical  | Unknown       |
| SBS60 | Technical  | Technical               | Technical  | Unknown       |
| SBS84 | APOBEC/AID | AID                     | AID        | Endogenous    |
| SBS85 | APOBEC/AID | Indirect effect of AID  | AID        | Endogenous    |
| SBS86 | Chemo      | Unknown chemotherapy    | Chemo      | Environmental |
| SBS87 | Chemo      | Thiopurine chemotherapy | Chemo      | Environmental |
| SBS88 | Environ    | Colibactin exposure     | Colibactin | Environmental |
| SBS89 | Unknown    | Unknown                 | SBS89      | Unknown       |
| SBS90 | Chemo      | Duocarmycin exposure    | Chemo      | Environmental |

# Supplementary References

- S1. Gerstung, M., Jolly, C., Leshchiner, I., Dentro, S.C., Gonzalez, S., Rosebrock, D., Mitchell, T.J., Rubanova, Y., Anur, P., Yu, K., et al. (2020). The evolutionary history of 2,658 cancers. *Nature* 578, 122–128. [10.1038/s41586-019-1907-7](https://doi.org/10.1038/s41586-019-1907-7).
